# Supplementary material
Source: HighWire-hosted journal article supplement (https://erj.ersjournals.com/highwire/filestream/113972/field_highwire_adjunct_files/0/Supplementary_tables_resupplied_at_galley.pdf)
Supplement: Supplementary_tables_resupplied_at_galley.pdf [file Supplementary_tables_resupplied_at_galley.pdf]

**Supplementary table S1.** MicroRNA cluster-regulated mRNA confirmed experimentally.

| <i>mRNA target</i> | miRNAs   | Ref.           | Pathological condition associated with upregulated miRNA expression levels |
|--------------------|----------|----------------|----------------------------------------------------------------------------|
| <i>AKT1</i>        | miR-93   | 1              | AC                                                                         |
|                    | miR-192  | 2              | AC and AC-COPD                                                             |
|                    | miR-17   | 3              | AC and AC-COPD                                                             |
|                    | miR-106b | 4              | AC                                                                         |
|                    | miR-194  | 4              | AC and AC-COPD                                                             |
|                    | miR-20a  | 4              | AC                                                                         |
| <i>APC</i>         | miR-192  | 5              | AC and AC-COPD                                                             |
|                    | miR-17   | 6              | AC and AC-COPD                                                             |
| <i>ATC</i>         | miR-18a  | 7              | AC-COPD                                                                    |
| <i>CCND1</i>       | miR-20a  | 4, 8-11        | AC                                                                         |
|                    | miR-19a  | 12,13          | AC                                                                         |
|                    | miR-194  | 4              | AC and AC-COPD                                                             |
|                    | miR-17   | 8-11           | AC and AC-COPD                                                             |
|                    | miR-106b | 4              | AC                                                                         |
|                    | miR-92   | 8,11           | AC and AC-COPD                                                             |
| <i>KRAS</i>        | miR-25   | 14,15          | AC and AC-COPD                                                             |
|                    | miR-20a  | 11,14          | AC                                                                         |
|                    | miR-18a  | 16             | AC-COPD                                                                    |
|                    | miR-17   | 11,17          | AC and AC-COPD                                                             |
|                    | miR-92a  | 11,17          | AC and AC-COPD                                                             |
| <i>MYC</i>         | miR-20b  | 18             | AC-COPD                                                                    |
|                    | miR-20a  | 11,19,20       | AC                                                                         |
|                    | miR-19b  | 18-21          | AC and AC-COPD                                                             |
|                    | miR-19a  | 19-22          | AC                                                                         |
|                    | miR-18a  | 18, 20         | AC-COPD                                                                    |
|                    | miR-17   | 11,18, 20-23   | AC and AC-COPD                                                             |
|                    | miR-92a  | 18,23          | AC and AC-COPD                                                             |
| <i>PTEN</i>        | miR-212  | 42             | COPD                                                                       |
|                    | miR-93   | 1              | AC                                                                         |
|                    | miR-25   | 24             | AC and AC-COPD                                                             |
|                    | miR-20b  | 25             | AC-COPD                                                                    |
|                    | miR-20a  | 19, 25, 26     | AC                                                                         |
|                    | miR-19b  | 19,26          | AC and AC-COPD                                                             |
|                    | miR-19a  | 19,25, 27,28   | AC                                                                         |
|                    | miR-192  | 2              | AC and AC-COPD                                                             |
|                    | miR-18a  | 25,26          | AC-COPD                                                                    |
|                    | miR-17   | 19, 25,29-31   | AC and AC-COPD                                                             |
|                    | miR-106b | 24, 25, 31     | AC                                                                         |
|                    | miR-106a | 25             | AC and AC-COPD                                                             |
| miR-92a            | 19,30,   | AC and AC-COPD |                                                                            |

|       |          |        |                |
|-------|----------|--------|----------------|
|       |          | 31, 40 |                |
| TP53  | miR-93   | 32     | AC             |
|       | miR-25   | 32     | AC and AC-COPD |
|       | miR-20a  | 33     | AC             |
|       | miR-19b  | 32     | AC and AC-COPD |
|       | miR-19a  | 32     | AC             |
|       | miR-194  | 34-36  | AC and AC-COPD |
|       | miR-192  | 34-36  | AC and AC-COPD |
|       | miR-17   | 32,33  | AC and AC-COPD |
|       | miR-106b | 32     | AC             |
|       | miR-92   | 17,33  | AC and AC-COPD |
| RB1   | miR-20a  | 37     | AC             |
|       | miR-17   | 38     | AC and AC-COPD |
|       | miR-106a | 37,39  | AC and AC-COPD |
| IRAK4 | miR-132  | 41     | COPD           |
|       | miR-212  | 41     | COPD           |
| I16   | miR-212  | 43     | COPD           |
|       | miR-132  | 44     | COPD           |

AC: Lung adenocarcinoma

#### References

1. Fu X, Tian J, Zhang L, *et al.* Involvement of microRNA-93, a new regulator of PTEN/akt signaling pathway, in regulation of chemotherapeutic drug cisplatin chemosensitivity in ovarian cancer cells. *FEBS Lett* 2012;586:1279-86.
2. Kato M, Putta S, Wang M, *et al.* TGF-beta activates Akt kinase through a microRNA-dependent amplifying circuit targeting PTEN. *Nat Cell Biol* 2009;11:881-9.
3. Budde H, Schmitt S, Fitzner D, *et al.* Control of oligodendroglial cell number by the miR-17-92 cluster. *Development* 2010;137:2127-32.
4. Ohlsson Teague EM, Van der Hoek KH, Van der Hoek MB, *et al.* MicroRNA-regulated pathways associated with endometriosis. *Mol Endocrinol* 2009;23:265-75.
5. Yantiss RK, Goodarzi M, Zhou XK, *et al.* Clinical, pathologic, and molecular features of early-onset colorectal carcinoma. *Am J Surg Pathol* 2009;33:572-82.
6. Lu Y, Xiao J, Lin H, *et al.* A single anti-microRNA antisense oligodeoxyribonucleotide (AMO) targeting multiple microRNAs offers an improved approach for microRNA interference. *Nucleic Acids Res* 2009;37:e24.
7. Qased AB, Yi H, Liang N, *et al.* MicroRNA-18a upregulates autophagy and ataxia telangiectasia mutated gene expression in HCT116 colon cancer cells. *Mol Med Rep* 2013;7:559-64.
8. Deshpande A, Pastore A, Deshpande AJ, *et al.* 3'UTR mediated regulation of the cyclin D1 proto-oncogene. *Cell Cycle* 2009;8:3584-92.

9. Yu Z, Willmarth NE, Zhou J, *et al.* microRNA 17/20 inhibits cellular invasion and tumor metastasis in breast cancer by heterotypic signaling. *Proc Natl Acad Sci U S A* 2010;107:8231-6.
10. Yu Z, Wang C, Wang M, *et al.* A cyclin D1/microRNA 17/20 regulatory feedback loop in control of breast cancer cell proliferation. *J Cell Biol* 2008;182:509-17.
11. Vasilatou D, Papageorgiou SG, Kontsioti F, *et al.* Expression analysis of mir-17-5p, mir-20a and let-7a microRNAs and their target proteins in CD34+ bone marrow cells of patients with myelodysplastic syndromes. *Leuk Res* 2013 ;37:251-8.
12. Qin X, Wang X, Wang Y, *et al.* MicroRNA-19a mediates the suppressive effect of laminar flow on cyclin D1 expression in human umbilical vein endothelial cells. *Proc Natl Acad Sci U S A* 2010;107:3240-4.
13. Jiang Q, Feng MG, Mo YY. Systematic validation of predicted microRNAs for cyclin D1. *BMC Cancer* 2009;9:194.
14. Dacic S, Kelly L, Shuai Y, *et al.* miRNA expression profiling of lung adenocarcinomas: correlation with mutational status. *Mod Pathol* 2010;23:1577-82.
15. Wu Q, Wang C, Lu Z, *et al.* Analysis of serum genome-wide microRNAs for breast cancer detection. *Clin Chim Acta* 2012;413:1058-65.
16. Tsang WP, Kwok TT. The miR-18a\* microRNA functions as a potential tumor suppressor by targeting on K-Ras. *Carcinogenesis* 2009;30:953-9.
17. Dews M, Homayouni A, Yu D, Murphy D, *et al.* Augmentation of tumor angiogenesis by a Myc-activated microRNA cluster. *Nat Genet* 2006;38:1060-5.
18. Castellano L, Giamas G, Jacob J, *et al.* The estrogen receptor-alpha-induced microRNA signature regulates itself and its transcriptional response. *Proc Natl Acad Sci U S A* 2009;106:15732-7.
19. Hong L, Lai M, Chen M, *et al.* The miR-17-92 cluster of microRNAs confers tumorigenicity by inhibiting oncogene-induced senescence. *Cancer Res* 2010;70:8547-57.
20. Attar M, Arefian E, Nabiuni M, *et al.* MicroRNA 17-92 expressed by a transposone-based vector changes expression level of cell-cycle-related genes. *Cell Biol Int.* 2012;36:1005-12.
21. Chen L, Li C, Zhang R, *et al.* miR-17-92 cluster microRNAs confers tumorigenicity in multiple myeloma. *Cancer Lett.* 2011 Oct 1;309(1):62-70.
22. Mu P, Han YC, Betel D, *et al.* Genetic dissection of the miR-17~92 cluster of microRNAs in Myc-induced B-cell lymphomas. *Genes Dev* 2009;23:2806-11.
23. Dews M, Fox JL, Hultine S, *et al.* The myc-miR-17~92 axis blunts TGF{beta} signaling and production of multiple TGF{beta}-dependent antiangiogenic factors. *Cancer Res* 2010;70:8233-46.

24. Poliseno L, Salmena L, Riccardi L, *et al.* Identification of the miR-106b~25 microRNA cluster as a proto-oncogenic PTEN-targeting intron that cooperates with its host gene MCM7 in transformation. *Sci Signal* 2010;3:ra29.
25. Guo J, Miao Y, Xiao B, *et al.* Differential expression of microRNA species in human gastric cancer versus non-tumorous tissues. *J Gastroenterol Hepatol* 2009;24:652-7.
26. Olive V, Bennett MJ, Walker JC, *et al.* miR-19 is a key oncogenic component of mir-17-92. *Genes Dev.* 2009;23:2839-49.
27. Cao Y, Yu SL, Wang Y, *et al.* MicroRNA-dependent regulation of PTEN after arsenic trioxide treatment in bladder cancer cell line T24. *Tumour Biol* 2011;32:179-88.
28. Lewis BP, Shih IH, Jones-Rhoades MW, *et al.* Prediction of mammalian microRNA targets. *Cell* 2003;115:787-98.
29. Xiao C, Srinivasan L, Calado DP, *et al.* Lymphoproliferative disease and autoimmunity in mice with increased miR-17-92 expression in lymphocytes. *Nat Immunol* 2008;9:405-14.
30. Sievers C, Meira M, Hoffmann F, *et al.* Altered microRNA expression in B lymphocytes in multiple sclerosis: towards a better understanding of treatment effects. *Clin Immunol* 2012;144:70-9.
31. Chen H, Qian K, Tang ZP, *et al.* Bioinformatics and microarray analysis of microRNA expression profiles of murine embryonic stem cells, neural stem cells induced from ESCs and isolated from E8.5 mouse neural tube. *Neurol Res.* 2010 Jul;32(6):603-13.
32. Pichiorri F, Suh SS, Ladetto M, *et al.* MicroRNAs regulate critical genes associated with multiple myeloma pathogenesis. *Proc Natl Acad Sci U S A* 2008;105:12885-90.
33. Inomata M, Tagawa H, Guo YM, *et al.* MicroRNA-17-92 down-regulates expression of distinct targets in different B-cell lymphoma subtypes. *Blood* 2009;113:396-402.
34. Jenkins RH, Martin J, Phillips AO, *et al.* Transforming growth factor  $\beta$ 1 represses proximal tubular cell microRNA-192 expression through decreased hepatocyte nuclear factor DNA binding. *Biochem J* 2012;443:407-16.
35. Pichiorri F, Suh SS, Rocci A, *et al.* Downregulation of p53-inducible microRNAs 192, 194, and 215 impairs the p53/MDM2 autoregulatory loop in multiple myeloma development. *Cancer Cell.* 2010 Oct 19;18(4):367-81.
36. Braun CJ, Zhang X, Savelyeva I, *et al.* p53-Responsive microRNAs 192 and 215 are capable of inducing cell cycle arrest. *Cancer Res* 2008;68:10094-104.
37. Volinia S, Calin GA, Liu CG, *et al.* A microRNA expression signature of human solid tumors defines cancer gene targets. *Proc Natl Acad Sci U S A* 2006;103:2257-61.

38. Kovalchuk O, Zemp FJ, Filkowski JN, *et al.* microRNAome changes in bystander three-dimensional human tissue models suggest priming of apoptotic pathways. *Carcinogenesis* 2010;31:1882-8.
39. Jiang Y, Wu Y, Greenlee AR, *et al.* miR-106a-mediated malignant transformation of cells induced by anti-benzo[a]pyrene-trans-7,8-diol-9,10-epoxide. *Toxicol Sci* 2011;119:50-60.
40. Lenz G, Wright GW, Emre NC, *et al.* Molecular subtypes of diffuse large B-cell lymphoma arise by distinct genetic pathways. *Proc Natl Acad Sci U S A* 2008;105:13520-5.
41. Nahid MA, Yao B, Dominguez-Gutierrez PR, *et al.* Regulation of TLR2-mediated tolerance and cross-tolerance through IRAK4 modulation by miR-132 and miR-212. *J Immunol* 2013;190:1250-63.
42. Xu L, Wang F, Xu XF, *et al.* Down-regulation of miR-212 expression by DNA hypermethylation in human gastric cancer cells. *Med Oncol* 2011;28 Suppl 1:S189-96.
43. Weigelt K, Bergink V, Burgerhout KM, *et al.* Down-regulation of inflammation-protective microRNAs 146a and 212 in monocytes of patients with postpartum psychosis. *Brain Behav Immun* 2013;29:147-55.
44. Estep M, Armistead D, Hossain N, *et al.* Differential expression of miRNAs in the visceral adipose tissue of patients with non-alcoholic fatty liver disease. *Aliment Pharmacol Ther* 2010;32:487-97

Supplementary table S1. Overlapping our results and two-meta-analysis of miRNAs expression in lung cancer

| <i>MicroRNAs</i> | <i>Molina-Pinelo et al.</i> |                |             | <i>Guan et al. [16]</i> |            | <i>Vosa et al. [17]</i> |
|------------------|-----------------------------|----------------|-------------|-------------------------|------------|-------------------------|
|                  | <i>AC</i>                   | <i>AC-COPD</i> | <i>COPD</i> | <i>LC</i>               | <i>ADC</i> | <i>LC</i>               |
| Let-7b           |                             | ↑              |             |                         |            |                         |
| miR-15a          |                             | ↑              |             |                         |            |                         |
| miR-15b          | ↑                           | ↑              | ↑           |                         |            |                         |
| miR-16           | ↑                           |                |             | ↓                       |            |                         |
| miR-17           | ↑                           | ↑              |             | ↑                       |            |                         |
| miR-18a          |                             | ↑              |             | ↑                       |            |                         |
| miR-19a          | ↑                           |                |             |                         |            |                         |
| miR-19b          | ↑                           | ↑              |             |                         |            |                         |
| miR-20a          | ↑                           |                |             | ↑                       |            |                         |
| miR-20b          |                             | ↑              |             | ↑                       |            |                         |
| miR-25           | ↑                           | ↑              |             |                         |            |                         |
| miR-26a          | ↑                           |                |             |                         |            |                         |
| miR-29b          |                             |                | ↓           |                         |            |                         |
| miR-31           | ↑                           |                |             | ↑                       | ↑          | ↑                       |
| miR-34a          |                             |                | ↓           |                         |            |                         |
| miR-92a          | ↑                           | ↑              |             |                         |            |                         |
| miR-93           | ↑                           |                |             | ↑                       |            |                         |
| miR-98           |                             |                | ↓           |                         |            |                         |
| miR-99a          | ↑                           |                |             | ↓                       |            |                         |
| miR-100          | ↑                           |                |             |                         |            |                         |
| miR-101          |                             | ↑              |             | ↓                       |            |                         |
| miR-106a         | ↑                           | ↑              |             | ↑                       |            |                         |
| miR-106b         | ↑                           |                |             |                         |            |                         |
| miR-126          | ↑                           | ↑              |             | ↓                       | ↓          |                         |
| miR-130b         | ↑                           | ↑              |             | ↑                       |            |                         |
| miR-132          |                             |                | ↑           |                         |            |                         |
| miR-135b         | ↑                           |                |             | ↑                       |            |                         |
| miR-140-3p       | ↑                           | ↑              |             | ↓                       |            |                         |
| miR-145          |                             |                | ↑           | ↓                       | ↓          | ↓                       |
| miR-146b-5p      |                             |                | ↓           |                         |            |                         |
| miR-149          | ↑                           | ↑              |             |                         |            |                         |
| miR-181a         |                             | ↑              |             |                         |            |                         |
| miR-185          | ↑                           | ↑              |             |                         |            |                         |
| miR-192          | ↑                           | ↑              |             |                         |            |                         |
| miR-193a-5p      |                             |                | ↓           |                         |            |                         |
| miR-193b         | ↑                           | ↑              |             | ↑                       |            |                         |
| miR-194          | ↑                           | ↑              |             |                         |            |                         |
| miR-195          | ↑                           | ↑              |             | ↓                       |            |                         |
| miR-200b         | ↑                           |                |             | ↑                       |            | ↑                       |
| miR-200c         | ↑                           |                |             | ↑                       |            |                         |
| miR-210          | ↑                           | ↑              |             | ↑                       | ↑          | ↑                       |
| miR-212          |                             |                | ↑           |                         |            |                         |
| miR-218          |                             |                | ↓           | ↓                       | ↓          |                         |

|            |   |   |   |   |  |   |
|------------|---|---|---|---|--|---|
| miR-222    | ↑ | ↑ |   |   |  |   |
| miR-223    |   |   | ↑ |   |  |   |
| miR-301a   |   | ↑ |   |   |  |   |
| miR-320    | ↑ |   |   |   |  |   |
| miR-324-3p | ↑ |   |   |   |  |   |
| miR-324-5p |   |   | ↓ |   |  |   |
| miR-335    | ↑ | ↑ |   |   |  |   |
| miR-342-3p |   | ↓ | ↓ |   |  |   |
| miR-342-5p |   |   | ↑ |   |  |   |
| miR-365    |   | ↓ | ↓ |   |  |   |
| miR-375    | ↑ |   |   | ↑ |  |   |
| miR-422a   |   |   | ↑ |   |  |   |
| miR-423-5p |   |   | ↑ |   |  |   |
| miR-425    | ↑ | ↑ | ↑ |   |  |   |
| miR-449b   |   | ↑ |   |   |  |   |
| miR-451    | ↑ | ↑ |   | ↓ |  | ↓ |
| miR-454    | ↑ |   |   |   |  |   |
| miR-484    | ↑ |   |   |   |  |   |
| miR-486-3p | ↑ | ↑ | ↑ |   |  |   |
| miR-486-5p | ↑ |   |   | ↓ |  | ↓ |
| miR-511    |   | ↓ |   |   |  |   |
| miR-590-5p |   | ↑ |   |   |  |   |
| miR-652    | ↑ |   |   |   |  |   |

AC: Lung adenocarcinoma; LC: Lung cancer; ↑: Upregulated and ↓: Downregulated.
